# Supplementary material for: The CAM Model for CIC-DUX4 Sarcoma and Its Potential Use for Precision Medicine
Source: MDPI journal article supplement (doi:10.3390/cells10102613), 2021-10-01
Supplement: s1 [file s1]

# Supplementary Material

## The CAM model for *CIC-DUX4* sarcoma and its potential use for precision medicine

Aoi Komatsu, Kotaro Matsumoto, Yuki Yoshimatsu, Yooksil Sin, Arisa Kubota, Tomoki Saito, Ayaka Mizumoto, Shinya Ohashi, Manabu Muto, Rei Noguchi, Tadashi Kondo and Fuyuhiko Tamanoi

Supplementary Table S1: CD292 cell lines used in this study

| Cell line label         | Patient records     |
|-------------------------|---------------------|
| CD-89A (NCC-CDS1-X1-C1) | 29-year-old, female |
| CD-89C (NCC-CDS1-X3-C1) | 29-year-old, female |
| CD-292 (NCC-CDS2-C1)    | 50-year-old, female |

Supplementary Table S2: Primers used for the detection of the *CIC-DUX4* gene

| # | Sample name                     | Forward Primer Sequence<br>(5'-----3') | Reverse Primer Sequence<br>(5'-----3') | Enzyme                                    |
|---|---------------------------------|----------------------------------------|----------------------------------------|-------------------------------------------|
| 1 | CAM tumor #3                    | ATCATGCAGGCTGCCACT                     | ATGCCTTGCATCTGCCC                      | Platinum Taq DNA Polymerase High Fidelity |
| 2 | CAM tumor #4                    | ATCATGCAGGCTGCCACT                     | ATGCCTTGCATCTGCCC                      | Platinum Taq DNA Polymerase High Fidelity |
| 3 | CD-292 cell line                | ATCATGCAGGCTGCCACT                     | ATGCCTTGCATCTGCCC                      | Platinum Taq DNA Polymerase High Fidelity |
| 4 | Only CAM                        | ATCATGCAGGCTGCCACT                     | ATGCCTTGCATCTGCCC                      | Platinum Taq DNA Polymerase High Fidelity |
| 5 | CAM organoid                    | ATCATGCAGGCTGCCACT                     | ATGCCTTGCATCTGCCC                      | KOD-Plus-Neo DNA polymerase               |
| 6 | CD-292 TP-10<br>(Passage tumor) | GGGGACATCTTCACCTTTGA                   | CCAGGAAAGAATGGCAGTTC                   | Platinum Taq DNA Polymerase High Fidelity |

## Supplementary Figure S1

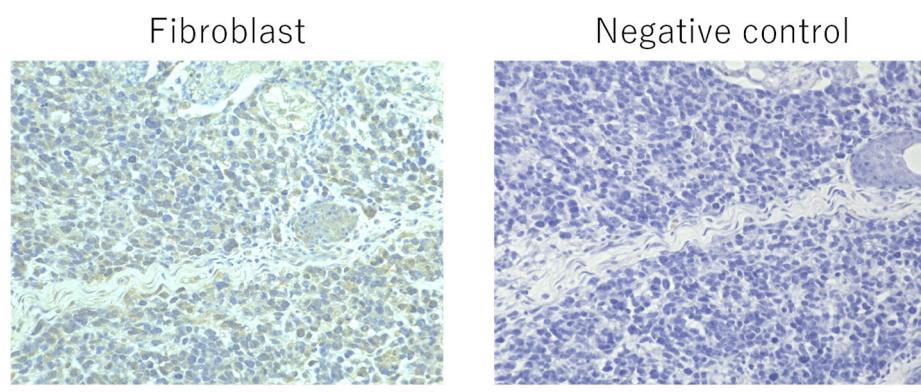

CAM tumor derived from CIC-DUX4 sarcoma cells was stained for the presence of fibroblast using C1 antibody as described in Materials and Methods. Negative control shows staining without the antibody. A scale bar represents 0.05 mm.
